# Supplementary material
Source: MDPI journal article supplement (https://www.mdpi.com/1424-8247/17/1/104)

# Recent Advances in Pyrimidine-Based Drugs

Baskar Nammalwar <sup>1</sup> and Richard A. Bunce <sup>2,\*</sup>

<sup>1</sup> Affiliation 1: nbaskarphd@gmail.com (Vividion Therapeutics, 5820 Nancy Ridge Drive, San Diego, CA 92121, USA)

<sup>2</sup> Affiliation 2: Department of Chemistry, Oklahoma State University, Stillwater, OK 74078-3071, USA

\* Correspondence: rab@okstate.edu; Tel.: +1-405-744-5952

Comparison compounds mentioned in this article (in order of appearance).

**Certinib** - antitumor drug for anaplastic lymphoma kinase (ALK)

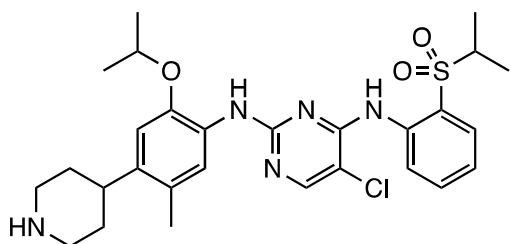

**Isoniazid** - antibiotic for treating tuberculosis

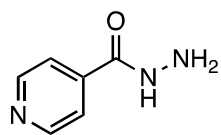

**Rifampicin** - antibiotic used to treat bacterial infections such as tuberculosis

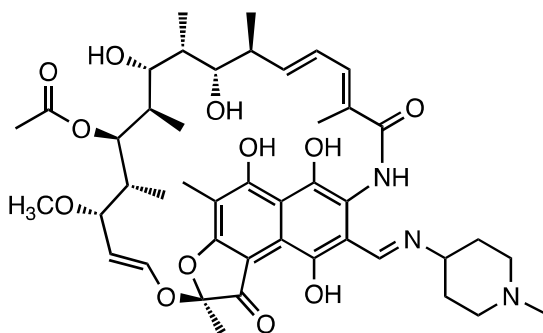

**Linezolid** - antibiotic used to treat Gram positive infections

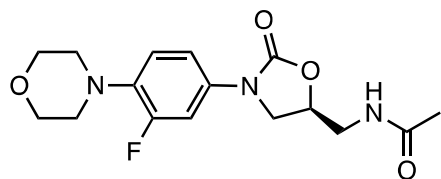

**Methicillin** - a penicillinase-resistant  $\beta$ -lactam antibiotic related to penicillin

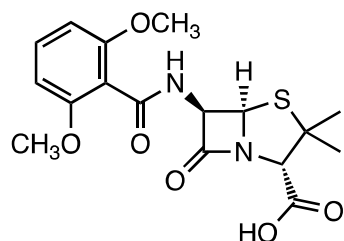

**Amphotericin B** - an antifungal agent used for fungal infections and leishmaniasis

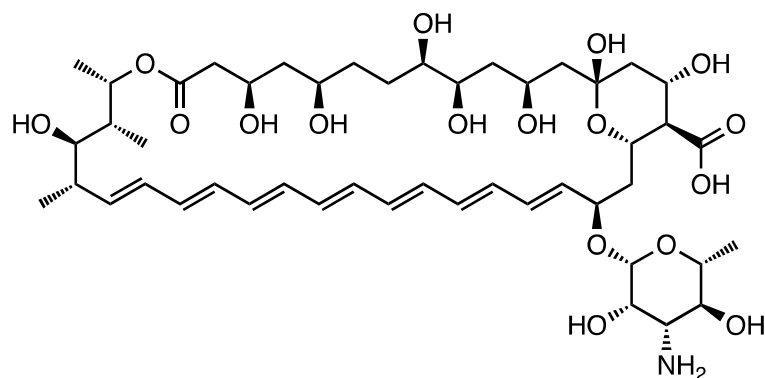

**Fluconazole** - an antifungal medication

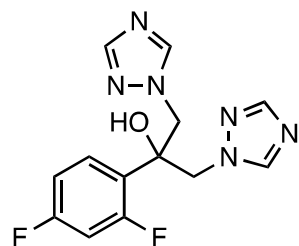

**BH-11C** - and NNRTI antiviral active against HIV-1

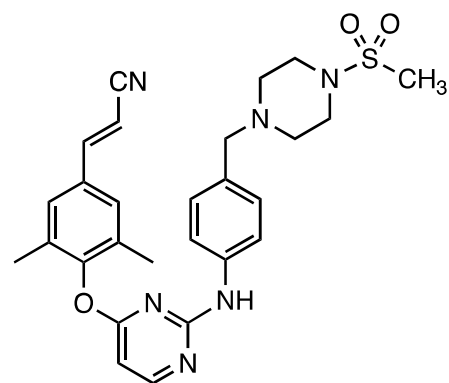

**Oseltamivir (Tamiflu®)** - an antiviral used to treat influenza A and B

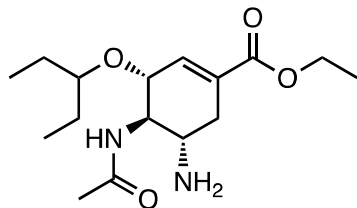

**Baloxavir (Xofluza®)** - an antiviral used to treat influenza A and B

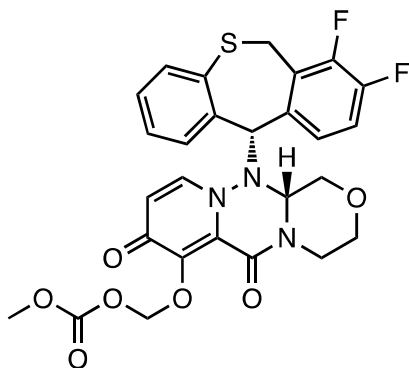

**TAE226** - a dual inhibitor of focal adhesion kinase and insulin-like growth factor-I receptor

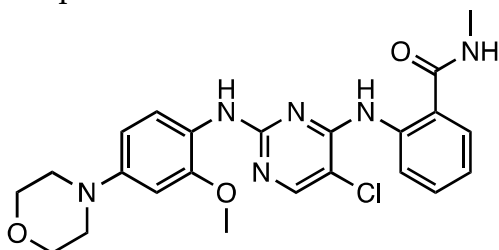

**5-Fluorouracil** - a cytotoxic chemotherapy medication used against cancer

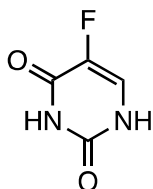

**Staurosporine** - an alkaloid antibiotic from *Streptomyces staurosporeus*; an ATP protein kinase inhibitor

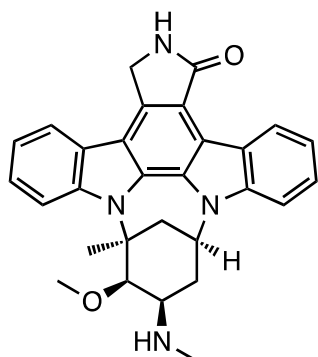

**Cetuxiab (Erbitux®)** - a recombinant monoclonal antibody; an epidermal growth factor inhibitor medication used to treat metastatic cancers

**Panitumumab (Vectibix®)** - a human monoclonal antibody specific to the EGFR, Erb-1, HER1 receptor in humans

**Necitumumab** - a recombinant human IgG1 monoclonal antibody used in the treatment of tumors and malignant cells

**Neratinib (Nerlynx®)** - a tyrosine kinase inhibitor used in the treatment of breast cancer

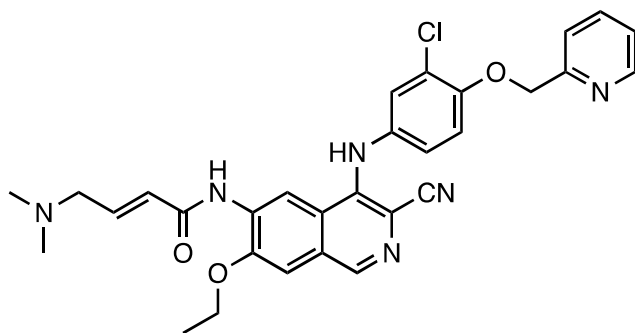

**Gefitinib (Iressa®)** - therapeutic agent used to treat various breast, lung and other cancers

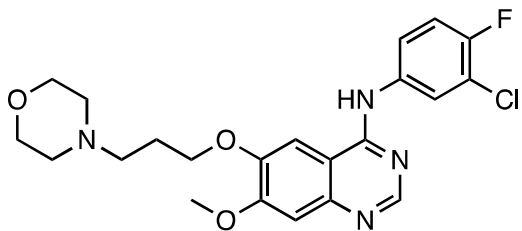

**Erlotinib (Tarceva®)** - agent used to treat non-small cell lung cancer

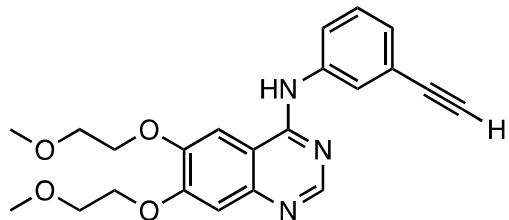

**Lapatinib (Tykerb®)** - a dual tyrosine kinase inhibitor which interrupts the EGFR and HER2 pathways used for treating breast cancer

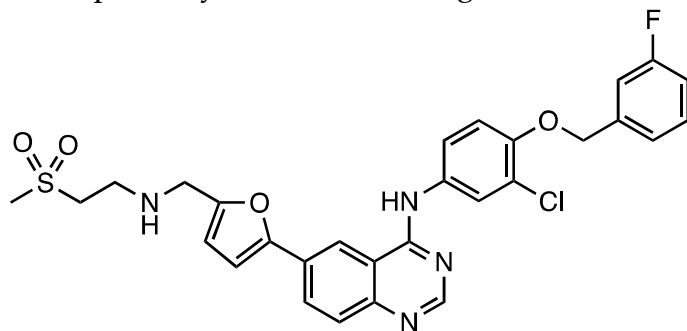

**Afatinib (Gilotrif®)** - a tyrosine kinase inhibitor medication used to treat non-small cell lung cancer

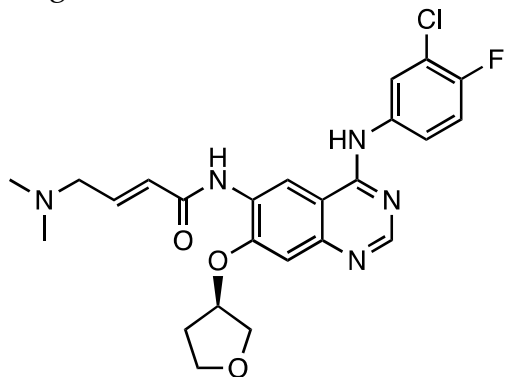

**Vandetinib (Caprelsa®)** - a medication used to treat thyroid cancer

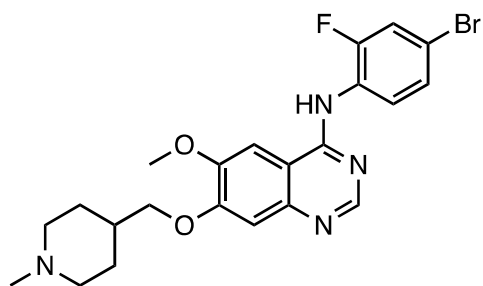

**Brigatinib (Alunbrig®)** - an anaplastic lymphoma kinase (ALK) and epidermal growth factor receptor (EGFR) inhibitor used to treat cancer

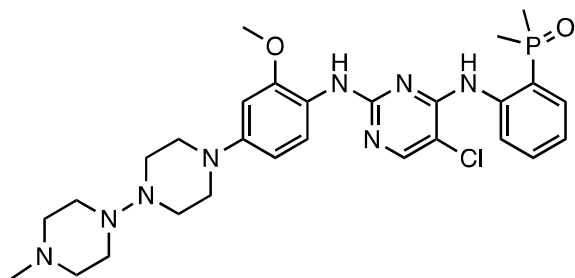

**Abemaciclib** - a CDK inhibitor medication for treatment of advanced metastatic breast cancers

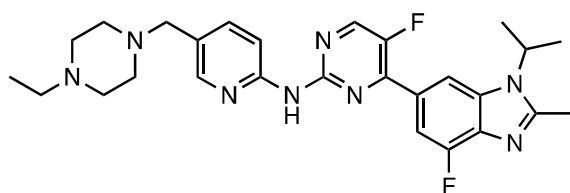

**Colchicine** - a medication used to treat gout and Behçet's disease (an inflammatory disorder of the eye)

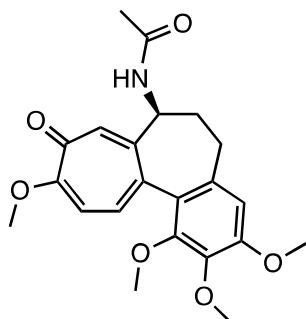

**Paclitaxel (Taxol®)** - used to treat ovarian, esophageal, breast, lung cervical and pancreatic cancers

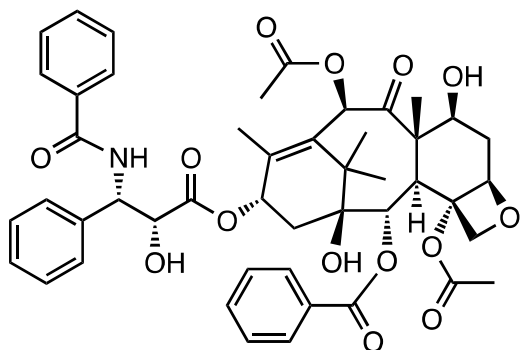

**GSK-J1** - an H3K27 histone demethylase inhibitor anticancer agent

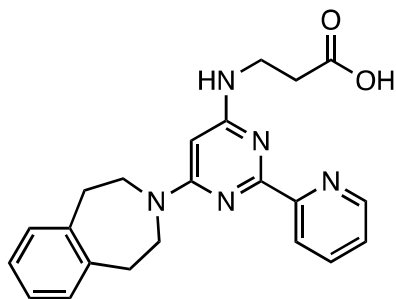

**Cytarabine** - medication to treat acute myeloid leukemia, chronic myelogenous leukemia and acute lymphoblastic leukemia

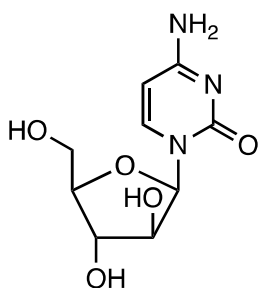

**Daunorubicine (aka Daunomycin)** - medication to treat acute myeloid leukemia, chronic myelogenous leukemia and acute lymphoblastic leukemia

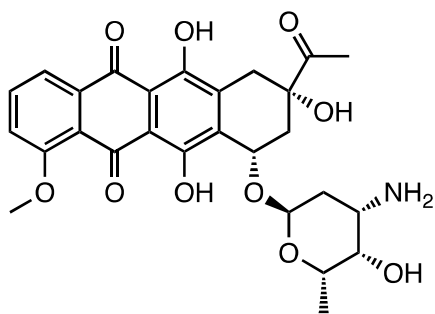

**Sorafenib (Nexavar®)** - a kinase inhibitor used to treat kidney and liver cancer as well as FMS-like tyrosine kinase 3- internal tandem duplications (FLT3-ITD) positive AML

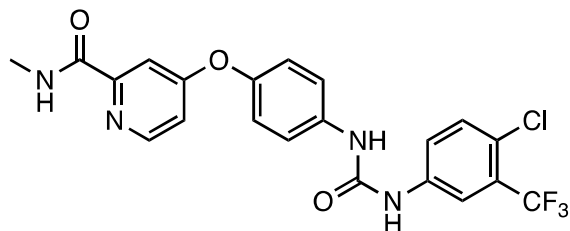

**Enzalutamide (Xtandi®)** - a non-steroidal antiandrogen used to treat prostate cancer

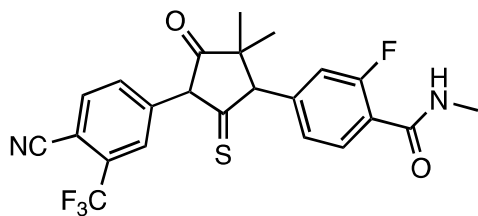

**HG-9-91-01** - a pan-SIK inhibitor of necroptosis

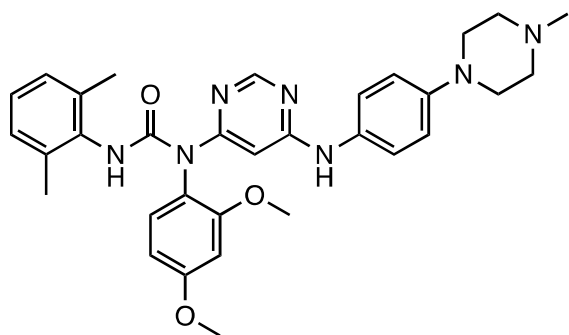

**Dasatinib (Sprycel®)** - medication to treat chronic myelogenous leukemia and acute lymphoblastic leukemia

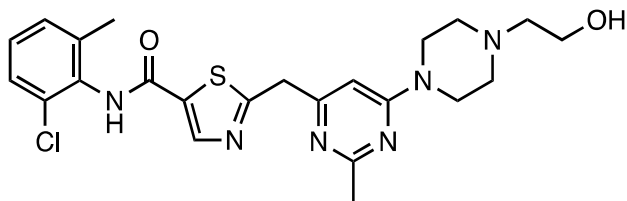

**Fedratinib (Inrebic®)** - an anticancer medication to treat myeloproliferative disease

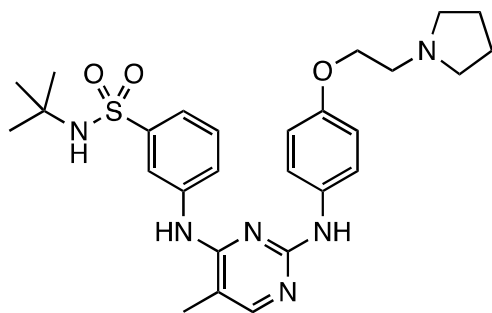



**Dexamethasone** - a corticosteroid that prevents the release of substances in the body that cause inflammation

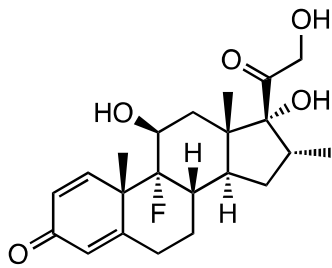

**Pioglitazone (Actose®)** - an anti-diabetic medication used to treat type 2 diabetes

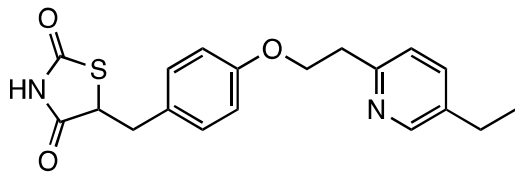

Supplement: s1 [file s1]
